# Supplementary material
Source: PubMed Central journal article supplement (PMC2809123)
Supplement: NIHMS163860-supplement-1_si_001.pdf [file NIHMS163860-supplement-1_si_001.pdf]

## Supporting Information

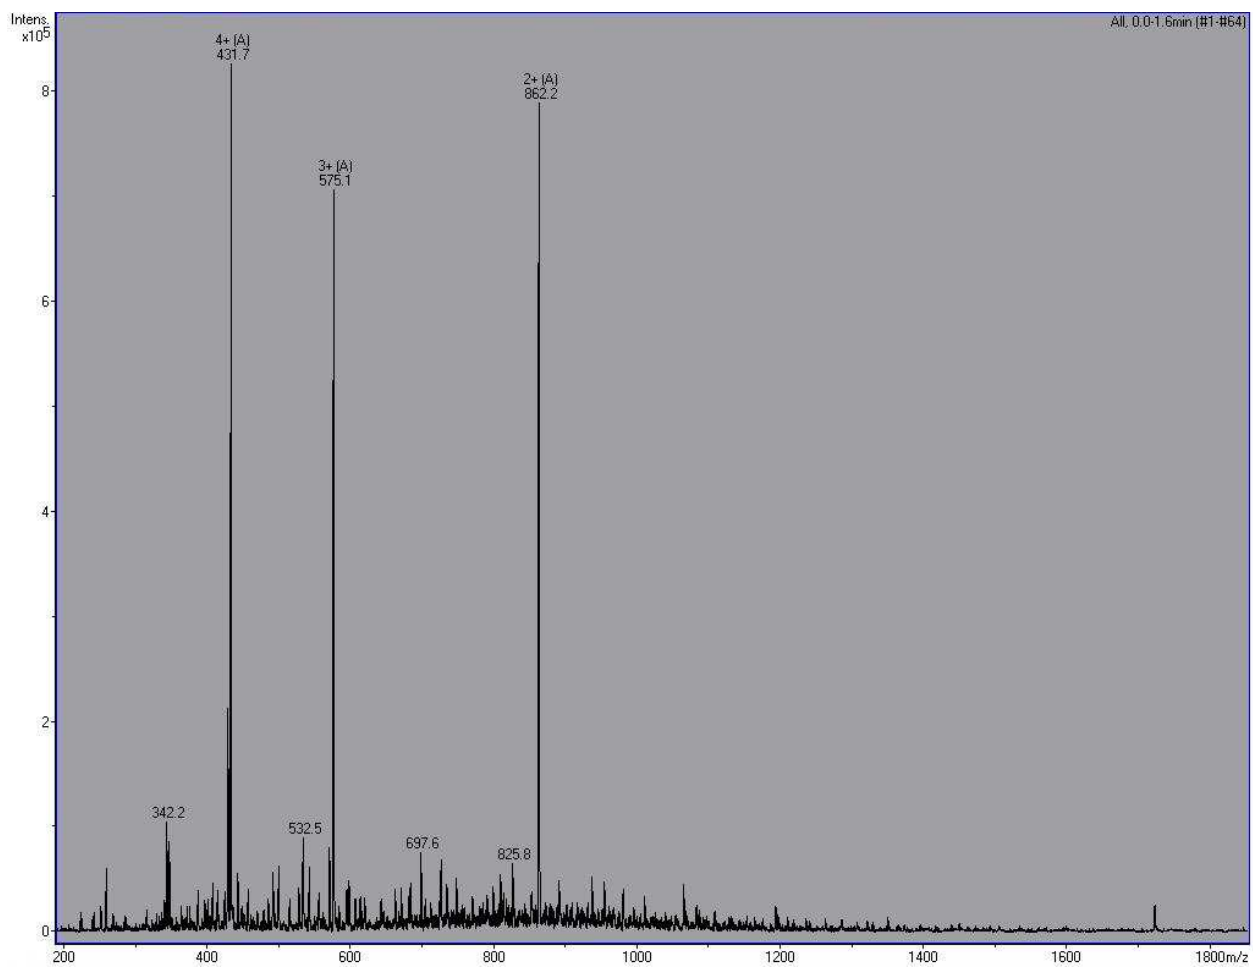

**Figure S1.** Mass spectrum obtained from the K<sub>11</sub> peptide. Species A has the confirmed mass of K<sub>11</sub>.

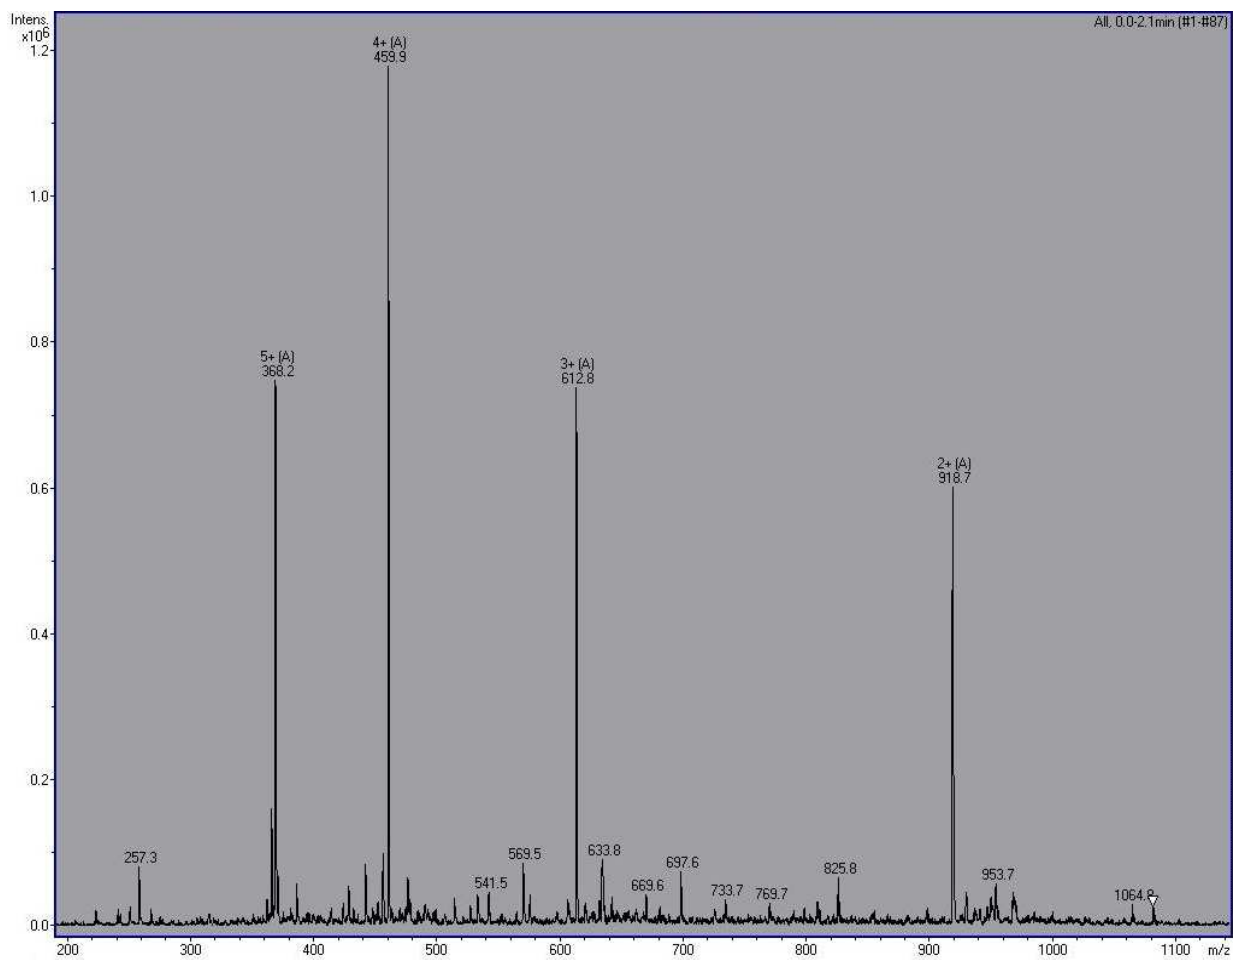

**Figure S2.** Mass spectrum obtained from the  $K_{11}$ -Ahx peptide. Species A has the confirmed mass of  $K_{11}$ -Ahx.

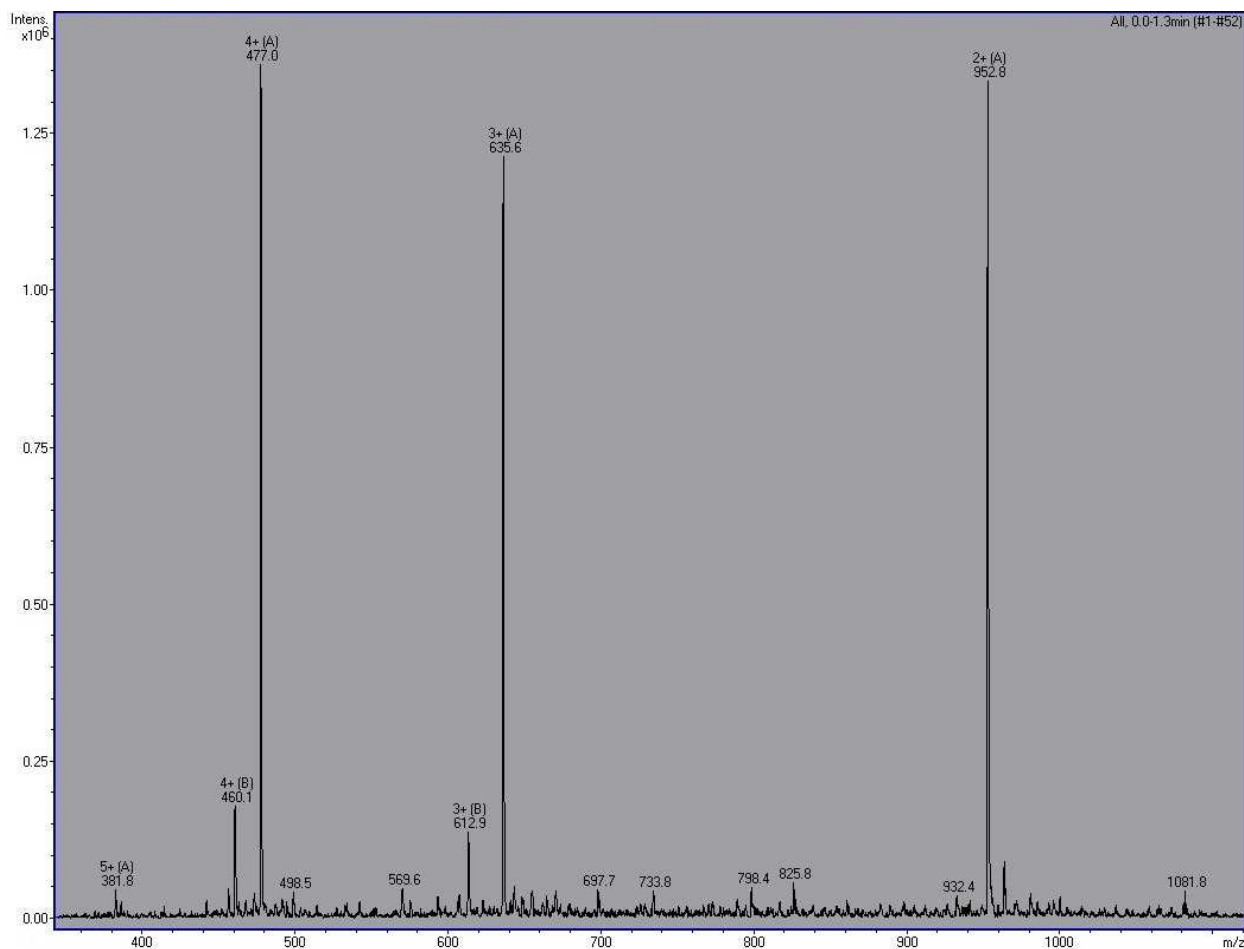

**Figure S3.** Mass spectrum obtained from K<sub>11</sub>-Ahx-MC peptide. Species A has the confirmed mass of K<sub>11</sub>-Ahx-MC while species B has the confirmed mass of K<sub>11</sub>-Ahx, indicating that a small percentage of the K<sub>11</sub>-Ahx is not modified with MC.

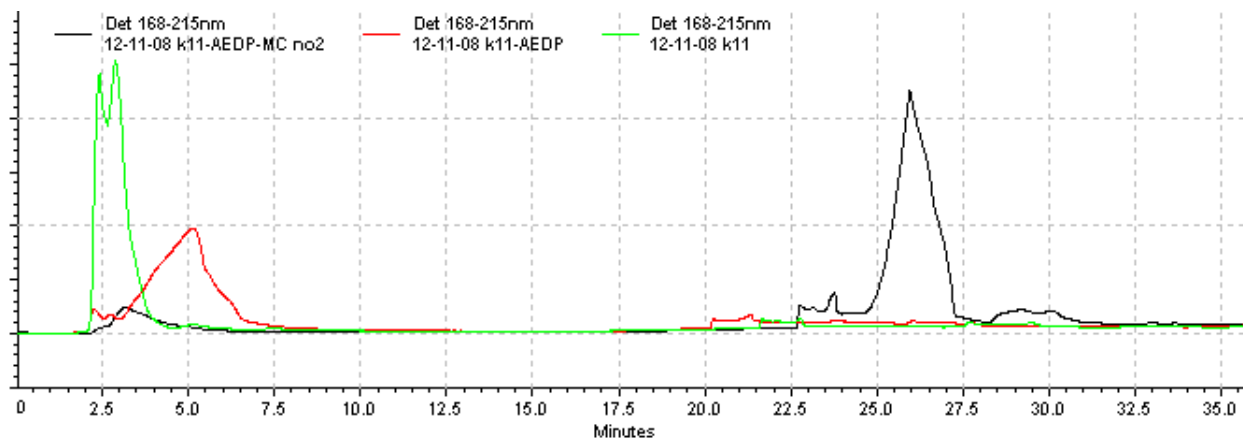

**Figure S4.** Assessment of peptide purity by HPLC. HPLC was performed using a Jupiter 4  $\mu\text{m}$  Proteo 90  $\text{\AA}$  (250 x 4.6 mm) reversed phase analytical column (Phenomenex) and a gradient from 98% Buffer A ( $\text{H}_2\text{O}$  + 0.01% TFA) to 10% Buffer B (Acetonitrile + 0.01% TFA) developed over 30 minutes.  $\text{K}_{11}$  (green) elutes around 2.5 min,  $\text{K}_{11}$ -AEDP (red) elutes around 5 min, and  $\text{K}_{11}$ -AEDP-MC (black) elutes around 26 min. As can be seen from the black trace, some unmodified  $\text{K}_{11}$ -AEDP remains after reaction with MC, but this is only a small fraction (<10%) of the total peptide.
